# Supplementary material
Source: Springer Nature journal article supplement (https://www.springermedizin.de/resource/supplementary/12889_2013_6520_MOESM1_ESM.pdf/9498350)

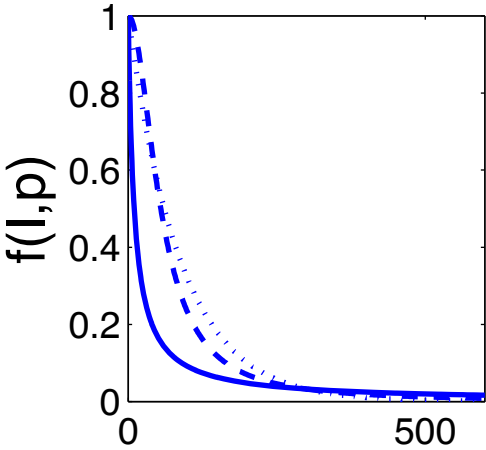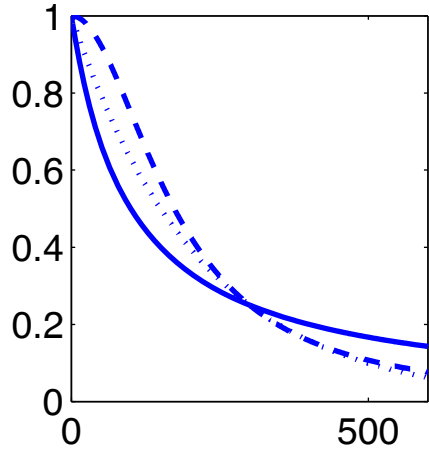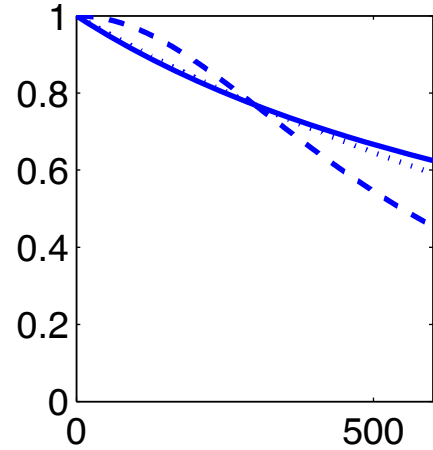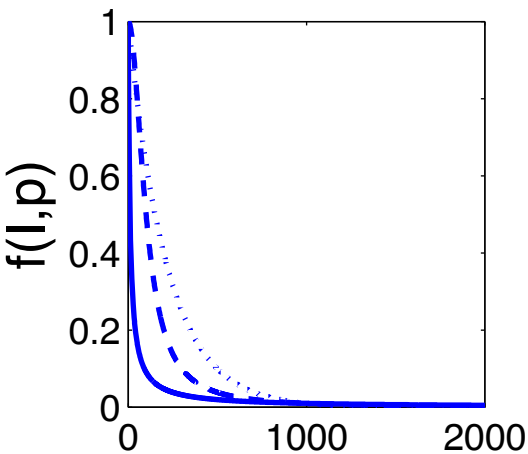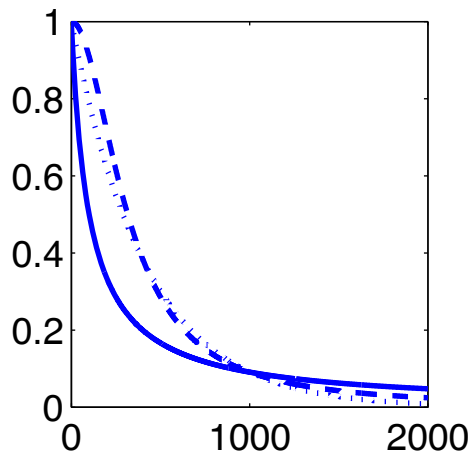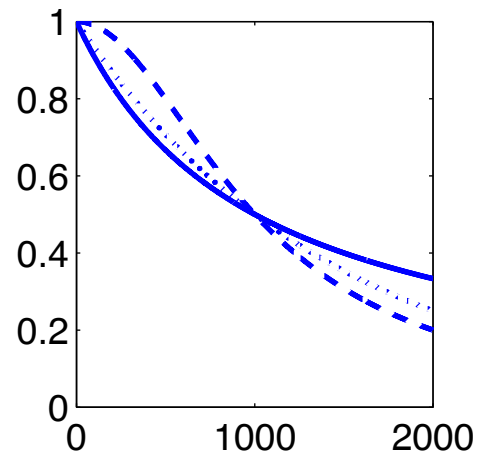

Number of Infecteds ( $I$ )

Supplement: MOESM1 [file 9498350]
